# Supplementary material
Source: PubMed Central journal article supplement (PMC3734891)
Supplement: chest_144_2_616_ds01.pdf [file chest_144_2_616_ds01.pdf]

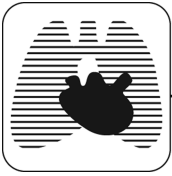

## Latent Class Analysis Identifies Distinct Phenotypes of Primary Graft Dysfunction After Lung Transplantation

*Rupal J. Shah, MD; Joshua M. Diamond, MD; Edward Cantu, MD; James C. Lee, MD; David J. Lederer, MD; Vibha N. Lama, MD; Jonathan Orens, MD, FCCP; Ann Weinacker, MD, FCCP; David S. Wilkes, MD; Sangeeta Bhorade, MD, FCCP; Keith M. Wille, MD; Lorraine B. Ware, MD; Scott M. Palmer, MD, FCCP; Maria Crespo, MD; A. Russell Localio, PhD; Ejigayehu Demissie, MSN; Steven M. Kawut, MD, FCCP; Scarlett L. Bellamy, ScD; and Jason D. Christie, MD, FCCP*

### **e-Appendix 1.** IRB Approval Details by Site:

Columbia University IRB:  
Approved, protocol number IRBAAAC1924.

University of Pennsylvania IRB:  
Approved, protocol number 806468.

Vanderbilt University IRB:  
Approved, protocol number 030089.

Stanford University IRB:  
Approved, protocol number 13554.

University of Alabama IRB:  
Approved, protocol numbers F020507004 and X080208001.

Johns Hopkins University IRB:  
Approved, protocol number NA\_00009182.

University of Michigan IRB:  
Approved, protocol number HUM00016290.

Duke University IRB:  
Approved, protocol number Pro00001306.

University of Chicago IRB:  
Approved, protocol number 14756A.

University of Pittsburgh IRB:  
Approved, protocol number 0703089.

*Online supplements are not copyedited prior to posting.*



### **e-Appendix 2.** Participants in the Lung Transplant Outcomes Group

#### Columbia University:

David Lederer, MD, MS (PI)  
Selim Arcasoy, MD  
Joshua Sonett, MD  
Jessie Wilt, MD  
Frank D'Ovidio, MD  
Nilani Ravichandran, NP  
Matthew Bacchetta, MD  
Debbie Rybak, BA  
Michael Koeckert, BA  
Robert Sorabella, BA

#### University of Pennsylvania (Coordinating site):

Jason Christie, MD, MS (PI)  
Steven M. Kawut, MD, MS  
Alberto Pocchetino, MD  
Y. Joseph Woo, MD  
Ejigayehu Demissie, MSN  
Robert M. Kotloff, MD  
Vivek N. Ahya, MD  
James Lee, MD, MS  
Denis Hadjiliadis, MD, MHS  
Melanie Rushefski, BS  
Richard Aplenc, MD  
Clifford Deutschman, MD, MS  
Benjamin Kohl, MD  
Edward Cantu, MD  
Joshua M. Diamond, MD, MS  
Rupal J. Shah, MD

#### Vanderbilt University:

Lorraine Ware, MD (PI)  
Stephanie Logan, RN

#### Stanford University:

Ann Weinacker, MD (PI)  
Ramona Dolye, MD  
Susan Spencer Jacobs, MSN  
Val Scott, MSN

#### University of Alabama, Birmingham:

Keith Wille, MD (PI)  
Joao deAndrade, MD  
Tonja Meadows, RN

*Online supplements are not copyedited prior to posting.*



Johns Hopkins University:

Jonathan Orens, MD (PI)

Ashish Shah, MD

John McDyer, MD

Reda Girgis, MD

University of Michigan:

Vibha Lama, MD, MS (PI)

Fernando Martinez, MD, MS

Emily Galopin, BS

Duke University:

Scott M. Palmer, MD, MHS (PI)

David Zaas, MD, MBA

R. Duane Davis, MD

Ashley Finlen-Copeland, MSW

University of Chicago:

Sangeeta Bhorade, MD (PI)

University of Pittsburgh:

Maria Crespo, MD (PI)



**e-Figure 1.** 4 Class model generated using latent class analysis. The y-axis indicates the probability of ISHLT PGD grade on a given day. The x-axis is the post-operative day. A given probability of PGD grade for each day is represented by symbols connected by corresponding lines (solid circle is grade 3, X is grade 1 or 2, hollow circle is grade 0). The line with the highest probability generated from the model indicates that members of that class are most likely to have a particular grade on a particular day.

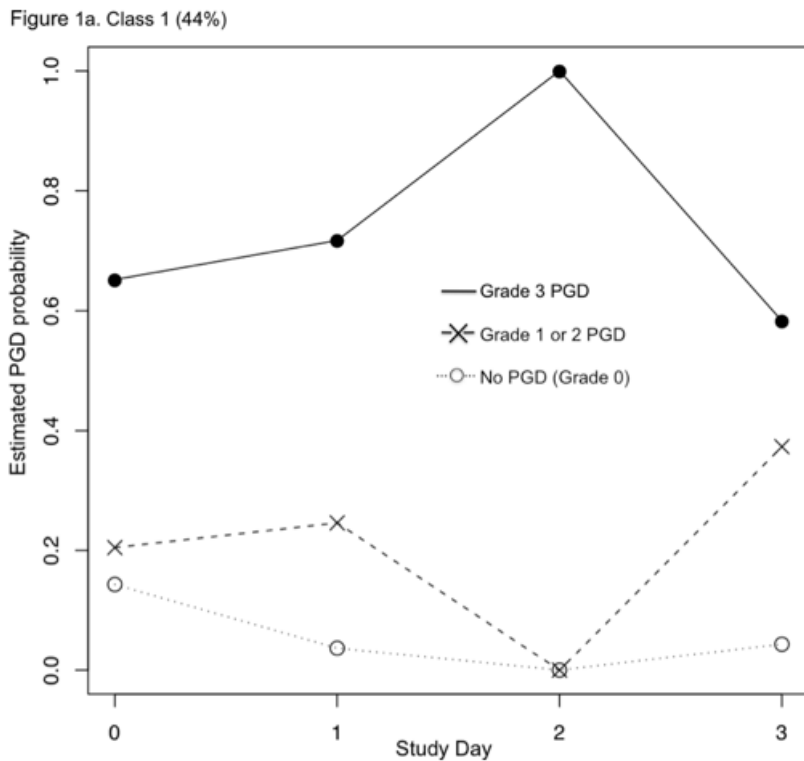

**e-Figure 1a.** Latent Class 1 (44% of grade 3 PGD population): Grade 3 PGD present on day 0 that persists to day 3. Grade 3 (solid circles) has the highest probability on all study days in this class.

*Online supplements are not copyedited prior to posting.*



Figure 1b. Class 2 (6%)

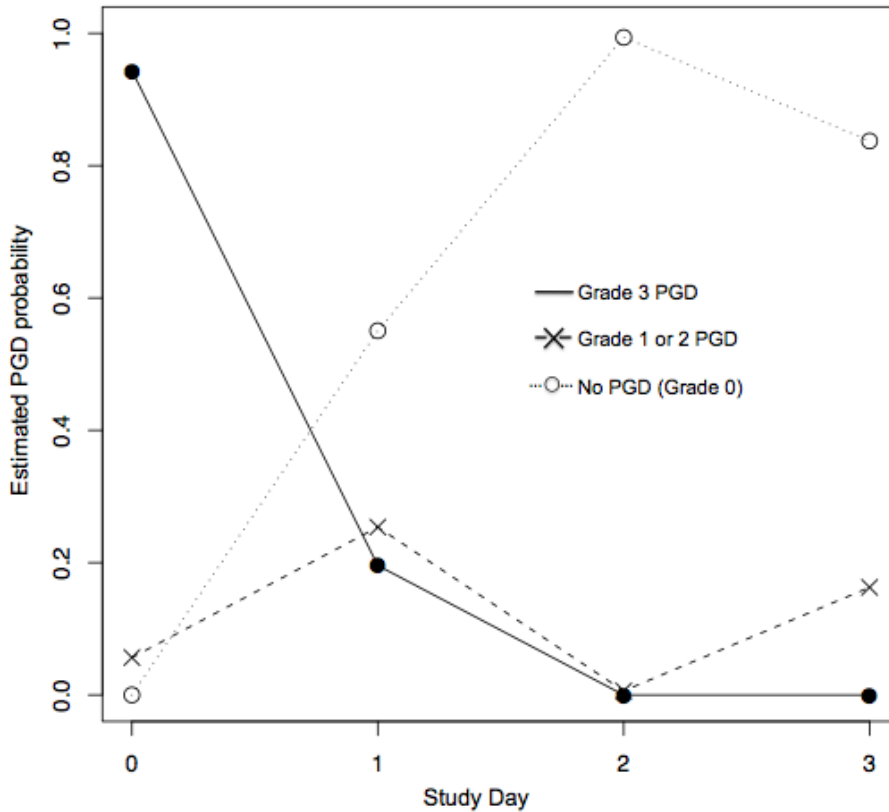

**e-Figure 1b.** Grade 3 PGD present on day 0 that resolves completely to grade 0 by day 3. On day 0, grade 3 (solid circles) has the highest probability, but the probability of grade 3 decreases by day 1, and on days 2 and 3, grade 0 has the highest probability (hollow circle).



Figure 1c. Class 3a (24%)

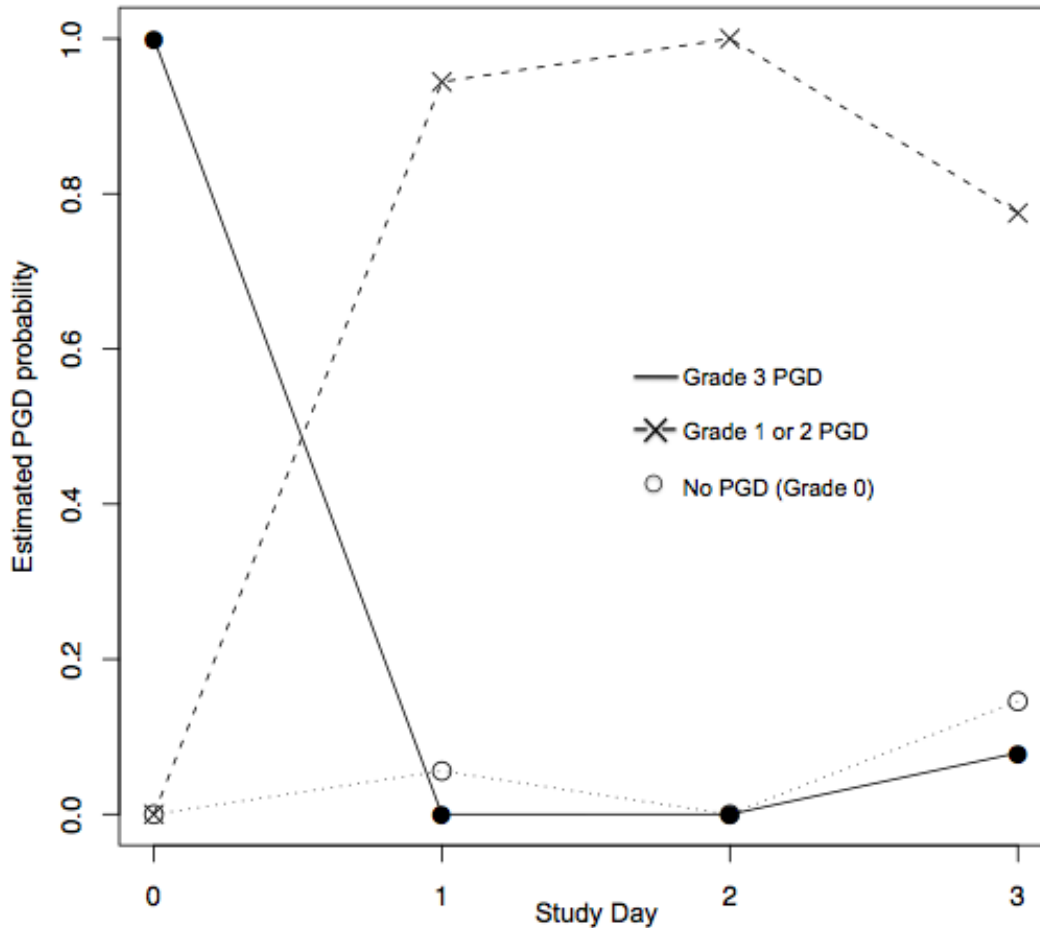

**e-Figure 1c.** Latent Class 3a (24% of grade 3 PGD population) Grade 3 PGD on day 0 that attenuates to lower grades 1 and 2 by day 1, but does not completely resolve by day 3. On day 0, grade 3 (solid circles) has the highest probability, but decreases by day 1, and on days 1, 2, and 3, intermediate grades (1, 2, denoted by X) have the highest probability.

*Online supplements are not copyedited prior to posting.*

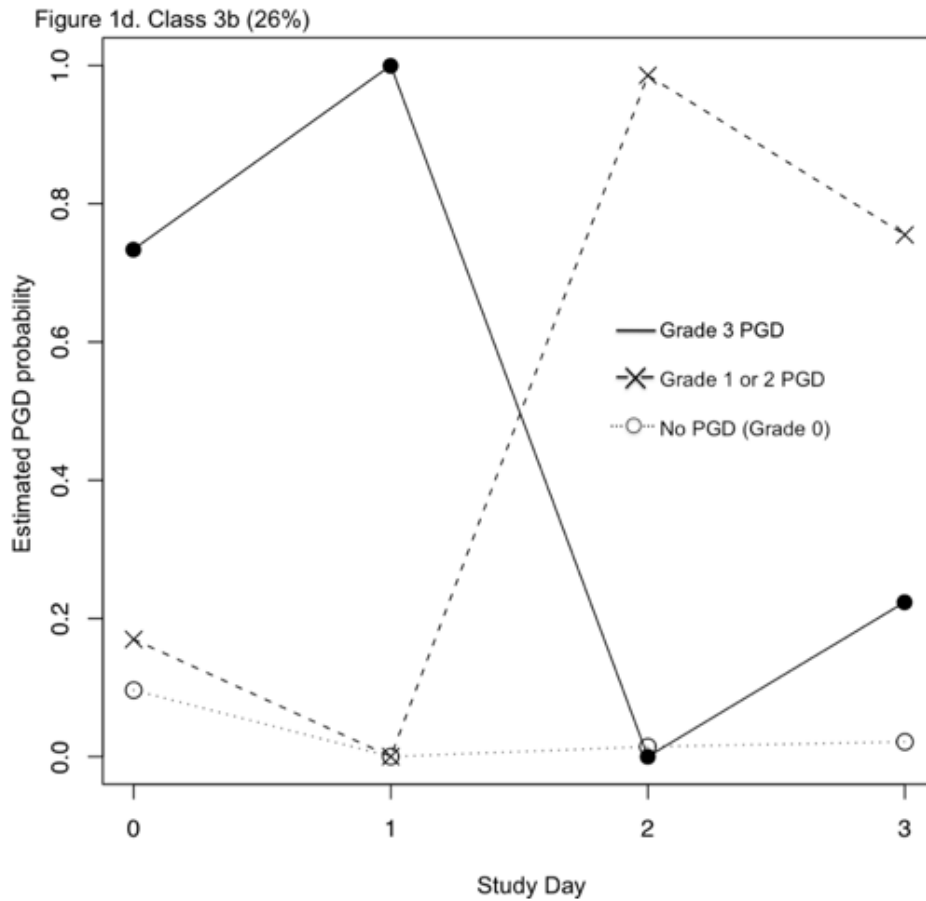

**e-Figure 1d.** Latent Class 3b (26% of grade 3 PGD population) Grade 3 PGD on day 0 that attenuates to lower grades 1 and 2 later, by day 2, but does not completely resolve by day 3. On day 0, grade 3 (solid circles) has the highest probability, but decreases by day 2, and on days 2 and 3, intermediate grades (1, 2, denoted by X) have the highest probability.



**e-Figure 2.** Association of classes with time to death in the 4 class model. P value generated using the log rank test.

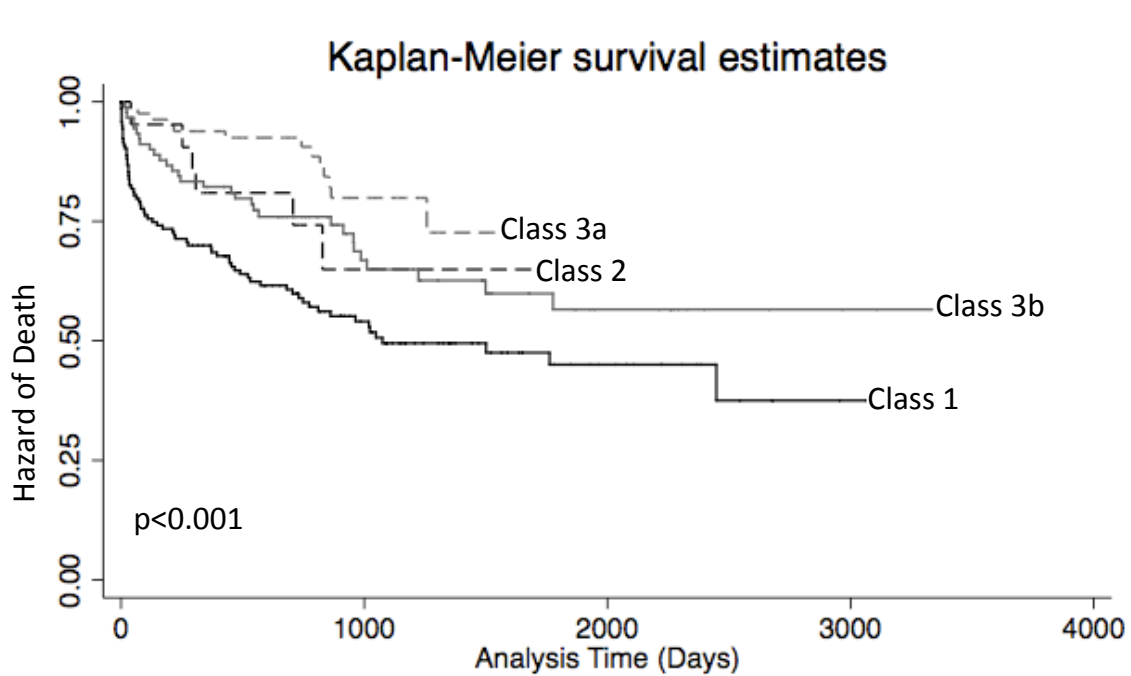





**e-Table 1.** Frequencies of demographic characteristics between classes in the 4 class model. P values generated using chi square and t-tests. PRBC=volume of packed red blood cells transfused within 24 hours. PAP=pulmonary artery pressure at the time of transplantation.

|                                  | <i>Class 1 (n=157)</i> | <i>Class 2 (n=23)</i> | <i>Class 3a (n=87)</i> | <i>Class 3b (n=94)</i> | <i>p Value</i> |
|----------------------------------|------------------------|-----------------------|------------------------|------------------------|----------------|
| <b>Recipient Characteristics</b> |                        |                       |                        |                        |                |
| <b>Recipient Age</b>             | 53.7 ± 11.4            | 50.8 ± 15.1           | 54.4 ± 12.6            | 50.7 ± 12.6            | 0.27           |
| <b>Native Disease</b>            |                        |                       |                        |                        |                |
| <i>COPD</i>                      | 39 (25%)               | 2 (9%)                | 27 (31%)               | 25 (27%)               | 0.13           |
| <i>CF</i>                        | 9 (6%)                 | 5 (22%)               | 11 (13%)               | 13 (14%)               |                |
| <i>IPF</i>                       | 67 (43%)               | 12 (52%)              | 38 (44%)               | 37 (40%)               |                |
| <i>PPH</i>                       | 11 (7%)                | 1(4%)                 | 3 (3%)                 | 5 (5%)                 |                |
| <i>Sarcoid</i>                   | 17 (11%)               | 1(4%)                 | 2 (2%)                 | 4 (4%)                 |                |
| <i>Other</i>                     | 14 (9%)                | 2 (9%)                | 6 (7%)                 | 9 (10%)                |                |
| <b>Female Recipient</b>          | 72 (46%)               | 9 (39%)               | 37 (43%)               | 45 (48%)               | 0.83           |
| <b>Prior Pregnancy</b>           | 60 (83%)               | 5 (56%)               | 26 (70%)               | 29 (64%)               | 0.07           |
| <b>Recipient Race</b>            |                        |                       |                        |                        |                |
| <i>Caucasian</i>                 | 120 (76%)              | 16 (70%)              | 69 (79%)               | 75 (80%)               | 0.36           |
| <i>African American</i>          | 28 (18%)               | 6 (26%)               | 10 (11%)               | 12 (13%)               |                |
| <i>Hispanic</i>                  | 3 (2%)                 | 1 (4%)                | 6 (7%)                 | 4 (4%)                 |                |
| <i>Asian</i>                     | 4 (3%)                 | 0 (0%)                | 0 (0%)                 | 3 (3%)                 |                |
| <i>Other</i>                     | 2 (1%)                 | 0 (0%)                | 2 (2%)                 | 0 (0%)                 |                |
| <b>BMI Recipient</b>             | 27.1 ± 4.8             | 24.6 ± 5.1            | 26.1 ± 4.8             | 25.9 ± 6.3             | 0.01           |
| <b>LAS (n=312)</b>               | 46.4 ± 15.7            | 46 ± 11.8             | 45.5 ± 15.7            | 48.0 ± 15.7            | 0.46           |
| <b>Donor Characteristics</b>     |                        |                       |                        |                        |                |
| <b>Female Donor</b>              | 76 (48%)               | 12 (52%)              | 32 (37%)               | 41 (44%)               | 0.30           |
| <b>Donor Age</b>                 | 35.9 ± 14.9            | 28.6 ± 10.4           | 35.2 ± 13.6            | 35.3 ± 13.1            | 0.17           |
| <b>Donor Race</b>                |                        |                       |                        |                        | 0.42           |
| <i>Caucasian</i>                 | 108 (69%)              | 15 (65%)              | 62 (71%)               | 56 (60%)               |                |
| <i>African American</i>          | 31 (20%)               | 6 (26%)               | 12 (14%)               | 20 (21%)               |                |
| <i>Hispanic</i>                  | 12 (8%)                | 2 (9%)                | 8 (9%)                 | 15 (16%)               |                |
| <i>Other</i>                     | 6 (4%)                 | 0 (0%)                | 5 (6%)                 | 3 (3%)                 |                |
| <b>Donor Vent Days</b>           |                        |                       |                        |                        |                |
| <i>One</i>                       | 52 (33%)               | 5 (22%)               | 18 (21%)               | 20 (21%)               | 0.36           |
| <i>Two</i>                       | 46 (29%)               | 5 (22%)               | 26 (30%)               | 26 (28%)               |                |
| <i>Three</i>                     | 27 (17%)               | 7 (30%)               | 18 (21%)               | 22 (23%)               |                |
| <i>Four</i>                      | 32 (20%)               | 6 (26%)               | 25 (29%)               | 26 (38%)               |                |
| <b>Donor Smoking</b>             | 80 (51%)               | 6 (26%)               | 36 (41%)               | 45 (48%)               | 0.11           |
| <b>Donor Mode of Death</b>       |                        |                       |                        |                        |                |
| <i>Trauma</i>                    | 61 (39%)               | 8 (35%)               | 41 (47%)               | 40 (43%)               | 0.10           |
| <i>Stroke</i>                    | 71 (45%)               | 9 (39%)               | 32 (37%)               | 40 (43%)               |                |
| <i>Anoxia</i>                    | 48 (5%)                | 3 (13%)               | 12 (14%)               | 5 (5%)                 |                |
| <i>Other</i>                     | 17 (11%)               | 3 (13%)               | 2 (2%)                 | 9 (10%)                |                |

Online supplements are not copyedited prior to posting.

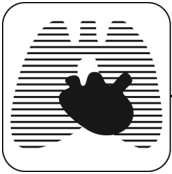

| <b>Operative Characteristics</b> |               |                 |                |                 |       |
|----------------------------------|---------------|-----------------|----------------|-----------------|-------|
| <i>Bilateral Transplant</i>      | 104 (66%)     | 14 (61%)        | 53 (61%)       | 70 (74%)        | 0.24  |
| <i>Cardiopulmonary Bypass</i>    | 94 (60%)      | 10 (43%)        | 34 (39%)       | 56 (60%)        | 0.007 |
| <i>Intra-Op Crystalloids</i>     | 973.4 ± 1542  | 1637.0 ± 2179.3 | 1680.5 ± 1971  | 1333.0 ± 2030.8 | 0.01  |
| <i>Intra-Op Nitric Oxide</i>     | 95 (61%)      | 15 (65%)        | 55 (63%)       | 61 (65%)        | 0.90  |
| <i>Reperfusion FiO2</i>          | 67.4 ± 28.7   | 71.8 ± 27.3     | 69.3 ± 29.8    | 64.0 ± 28.8     | 0.95  |
| <i>Tidal Volume (cc/kg)</i>      | 7.0 ± 3.1     | 7.9 ± 2.7       | 7.1 ± 2.7      | 6.9 ± 2.8       | 0.39  |
| <i>PRBC (mL)</i>                 | 1123.8 ± 1522 | 732.6 ± 1014.5  | 989.4 ± 1317.3 | 958.3 ± 1390.5  | 0.09  |
| <i>mean PAP (mmHg)</i>           | 35.5 ± 17.2   | 29.7 ± 13.5     | 27.9 ± 12.8    | 31.0 ± 11.3     | <0.01 |

**e-Table 2.** Frequencies of demographic characteristics using the 3 class analysis in the non-imputed dataset. Chi square and t tests were used to generate p values. . PRBC=volume of packed red blood cells transfused within 24 hours. PAP=pulmonary artery pressure at the time of transplantation.

|                                  | <i>Number with data</i> | <i>Class 1 (n=197)</i> | <i>Class 2 (n=25)</i> | <i>Class 3 (n=139)</i> | <i>P Value</i> |
|----------------------------------|-------------------------|------------------------|-----------------------|------------------------|----------------|
| <b>Recipient Characteristics</b> |                         |                        |                       |                        |                |
| <i>Recipient Age</i>             | 358                     | 53.0 ± 12.3            | 51.5 ± 14.6           | 53.4 ± 12.4            | 0.48           |
| <i>Native Disease</i>            | 359                     |                        |                       |                        | 0.50           |
| <i>COPD</i>                      |                         | 50 (26%)               | 3 (12%)               | 39 (28%)               |                |
| <i>CF</i>                        |                         | 17 (9%)                | 5 (20%)               | 16 (12%)               |                |
| <i>IPF</i>                       |                         | 81 (41%)               | 13 (52%)              | 60 (43%)               |                |
| <i>PPH</i>                       |                         | 11 (6%)                | 1 (4%)                | 8 (6%)                 |                |
| <i>Sarcoid</i>                   |                         | 17 (9%)                | 1 (4%)                | 6 (4%)                 |                |
| <i>CHD</i>                       |                         | 3 (2%)                 | 0 (0%)                | 0 (0%)                 |                |
| <i>Other</i>                     |                         | 17 (9%)                | 2 (8%)                | 9 (7%)                 |                |
| <i>Female Recipient</i>          | 360                     | 92 (47%)               | 10 (40%)              | 61 (44%)               | 0.76           |
| <i>Prior Pregnancy</i>           | 251                     | 40 (33%)               | 6 (27%)               | 32 (30%)               | 0.97           |
| <i>Recipient Race</i>            | 360                     |                        |                       |                        |                |
| <i>Caucasian</i>                 |                         | 152 (77%)              | 18 (72%)              | 109 (78%)              | 0.29           |
| <i>African American</i>          |                         | 32 (16%)               | 6 (24%)               | 18 (13%)               |                |
| <i>Hispanic</i>                  |                         | 4 (2%)                 | 1 (4%)                | 9 (7%)                 |                |
| <i>Asian</i>                     |                         | 6 (3%)                 | 0 (0%)                | 1 (1%)                 |                |
| <i>Other</i>                     |                         | 3 (2%)                 | 0 (0%)                | 1 (1%)                 |                |

Online supplements are not copyedited prior to posting.



|                                   |     |             |             |             |       |
|-----------------------------------|-----|-------------|-------------|-------------|-------|
| <b>Recipient Weight</b>           | 354 | 75.8 ± 19   | 70 ± 15.7   | 75.2 ± 17.9 | 0.52  |
| <b>LAS</b>                        | 312 | 46.9 ± 15.9 | 47.6 ± 14.2 | 45.7 ± 15   | 0.65  |
| <b>Donor Characteristics</b>      |     |             |             |             |       |
| <b>Female Donor</b>               | 359 | 91 (47%)    | 14 (56%)    | 57 (41%)    | 0.52  |
| <b>Donor Age</b>                  | 359 | 36.0 ± 14.5 | 27.8 ± 10.4 | 35.5 ± 13.1 | 0.09  |
| <b>Donor Race</b>                 | 358 |             |             |             | 0.64  |
| Caucasian                         |     | 127 (65%)   | 16 (67%)    | 96 (69%)    |       |
| Black                             |     | 42 (22%)    | 6 (25%)     | 20 (14%)    |       |
| Hispanic                          |     | 17 (9%)     | 2 (8%)      | 18 (13%)    |       |
| Asian                             |     | 7 (4%)      | 0 (0%)      | 2 (2%)      |       |
| Other                             |     | 2 (1%)      | 0 (0%)      | 2 (1%)      |       |
| <b>Donor Vent Days</b>            | 315 |             |             |             |       |
| One                               |     | 44 (27%)    | 6 (25%)     | 26 (21%)    | 0.36  |
| Two                               |     | 52 (31%)    | 6 (25%)     | 31 (22%)    |       |
| Three                             |     | 32 (20%)    | 7 (29%)     | 32 (26%)    |       |
| > 4                               |     | 69 (60%)    | 6 (5%)      | 40 (35%)    |       |
| <b>Donor Smoking</b>              | 350 | 92 (60%)    | 6 (24%)     | 56 (36%)    | 0.11  |
| <b>Donor Mode of Death</b>        | 360 |             |             |             | 0.13  |
| Trauma                            |     | 79 (40%)    | 10 (40%)    | 59 (42%)    |       |
| Suicide                           |     | 6 (3%)      | 1 (4%)      | 0 (0%)      |       |
| Stroke                            |     | 83 (42%)    | 9 (36%)     | 59 (39%)    |       |
| Anoxia                            |     | 10 (5%)     | 2 (8%)      | 14 (11%)    |       |
| Unknown                           |     | 1 (0.5%)    | 1 (4%)      | 5 (4%)      |       |
| Other                             |     | 16 (8%)     | 2 (8%)      | 2 (1%)      |       |
| <b>Operative Characteristics</b>  |     |             |             |             |       |
| <b>Bilateral Transplant</b>       | 356 | 133 (69%)   | 15 (63%)    | 91 (66%)    | 0.78  |
| <b>Cardiopulmonary Bypass</b>     | 357 | 118 (61%)   | 10 (42%)    | 63 (46%)    | 0.05  |
| <b>Intra-Op nitric oxide</b>      | 359 | 119 (60%)   | 15 (63%)    | 85 (62%)    | 0.96  |
| <b>Intra-Op Crystalloids (mL)</b> | 166 | 2391 ± 1596 | 3229 ± 1958 | 3156 ± 1950 | 0.20  |
| <b>Reperfusion FiO2</b>           | 200 | 72.6 ± 29.8 | 68.7 ± 28.4 | 70.2 ± 30.7 | 0.91  |
| <b>Tidal Volume (cc)</b>          | 191 | 587.7 ± 125 | 560.5 ± 107 | 612.1 ± 115 | 0.64  |
| <b>PRBC (mL)</b>                  | 277 | 1398 ± 1604 | 1157 ± 1041 | 1252 ± 1323 | 0.03  |
| <b>mean PAP (mmHg)</b>            | 285 | 33.7 ± 16.8 | 29.7 ± 12.6 | 29.2 ± 12.4 | 0.002 |

Online supplements are not copyedited prior to posting.



**e-Table 3.** Frequencies of demographic characteristics between the 4 classes in the non-imputed dataset. Chi square and t tests were used to generate p values. . PRBC=volume of packed red blood cells transfused within 24 hours. PAP=pulmonary artery pressure at the time of transplantation. Numbers with data are presented in supplemental table 2.

|                                  | <i>Class 1</i><br>(n=157) | <i>Class 2</i><br>(n=23) | <i>Class 3a</i><br>(n=87) | <i>Class 3b</i><br>(n=94) | <i>p Value</i> |
|----------------------------------|---------------------------|--------------------------|---------------------------|---------------------------|----------------|
| <b>Recipient Characteristics</b> |                           |                          |                           |                           |                |
| <i>Recipient Age</i>             | 53.6 ± 11.4               | 50.8 ± 15.1              | 54.5 ± 12.7               | 51.1 ± 13.1               | 0.22           |
| <i>Native Disease</i>            |                           |                          |                           |                           |                |
| <i>COPD</i>                      | 39 (25%)                  | 2 (9%)                   | 26 (30%)                  | 25 (27%)                  | 0.13           |
| <i>CF</i>                        | 9 (6%)                    | 5 (22%)                  | 11 (13%)                  | 13 (14%)                  |                |
| <i>IPF</i>                       | 67 (43%)                  | 12 (52%)                 | 38 (44%)                  | 37 (40%)                  |                |
| <i>PPH</i>                       | 11 (7%)                   | 1(4%)                    | 3 (3%)                    | 5 (5%)                    |                |
| <i>Sarcoid</i>                   | 17 (11%)                  | 1(4%)                    | 2 (2%)                    | 4 (4%)                    |                |
| <i>CHD</i>                       | 3 (2%)                    | 0 (0%)                   | 0 (0%)                    | 0 (0%)                    |                |
| <i>Other</i>                     | 11 (7%)                   | 2 (9%)                   | 6 (7%)                    | 9 (10%)                   |                |
| <i>Female Recipient</i>          | 72 (46%)                  | 9 (39%)                  | 37 (43%)                  | 45 (48%)                  | 0.85           |
| <i>Prior Pregnancy</i>           | 30 (32%)                  | 5 (25%)                  | 27 (31%)                  | 16 (31%)                  | 0.84           |
| <i>Recipient Race</i>            |                           |                          |                           |                           | 0.36           |
| <i>Caucasian</i>                 | 52 (33%)                  | 7 (30%)                  | 27 (31%)                  | 32 (34%)                  |                |
| <i>African American</i>          | 120 (76%)                 | 16 (70%)                 | 68 (79%)                  | 75 (80%)                  |                |
| <i>Hispanic</i>                  | 28 (18%)                  | 6 (26%)                  | 10 (12%)                  | 12 (13%)                  |                |
| <i>Asian</i>                     | 3 (2%)                    | 1 (4%)                   | 6 (7%)                    | 4 (4%)                    |                |
| <i>Other</i>                     | 4 (3%)                    | 0 (0%)                   | 0 (0%)                    | 3 (3%)                    |                |
| <i>Recipient Weight</i>          | 76.7 ± 17.6               | 70.5 ± 15.3              | 75.2 ± 17.3               | 73.7 ± 20.7               | 0.16           |
| <i>LAS</i>                       | 46.4 ± 15.7               | 46 ± 11.8                | 45.5 ± 15.7               | 48.0 ± 15.7               | 0.46           |
| <b>Donor Characteristics</b>     |                           |                          |                           |                           |                |
| <i>Female Donor</i>              | 76 (49%)                  | 12 (52%)                 | 33 (38%)                  | 41 (44%)                  | 0.57           |
| <i>Donor Age</i>                 | 36.5 ± 14.8               | 28.6 ± 10.4              | 34.8 ± 13.2               | 35.3 ± 13.2               | 0.17           |
| <i>Donor Race</i>                |                           |                          |                           |                           | 0.65           |
| <i>Caucasian</i>                 | 107 (69%)                 | 14 (64%)                 | 62 (71%)                  | 56 (60%)                  |                |
| <i>Black</i>                     | 30 (19%)                  | 6 (27%)                  | 12 (14%)                  | 20 (21%)                  |                |
| <i>Hispanic</i>                  | 12 (8%)                   | 2 (9%)                   | 8 (9%)                    | 15 (16%)                  |                |
| <i>Asian</i>                     | 4 (3%)                    | 9 (0%)                   | 4 (5%)                    | 2 (2%)                    |                |
| <i>Other</i>                     | 2 (1%)                    | 0 (0%)                   | 1 (1%)                    | 1 (1%)                    |                |
| <i>Donor Days on Ventilator</i>  |                           |                          |                           |                           |                |
| <i>One</i>                       | 41 (26%)                  | 5 (22%)                  | 15 (17%)                  | 15 (16%)                  | 0.51           |
| <i>Two</i>                       | 45 (29%)                  | 5 (22%)                  | 24 (28%)                  | 25 (37%)                  |                |
| <i>Three</i>                     | 24 (15%)                  | 7 (30%)                  | 19 (22%)                  | 21(22%)                   |                |
| <i>≥ 4</i>                       | 47 (30%)                  | 6 (26%)                  | 29 (33%)                  | 33 (35%)                  |                |

Online supplements are not copyedited prior to posting.



|                                       |               |                 |             |                 |       |
|---------------------------------------|---------------|-----------------|-------------|-----------------|-------|
| <b>Donor Smoking</b>                  | 75 (50%)      | 6 (26%)         | 32 (37%)    | 41 (45%)        | 0.25  |
| <b>Donor Mode of Death</b>            |               |                 |             |                 | 0.39  |
| Trauma                                | 62 (39%)      | 8 (35%)         | 40 (47%)    | 40 (43%)        |       |
| Suicide                               | 4 (3%)        | 1 (4%)          | 1 (1%)      | 1 (1%)          |       |
| Stroke                                | 71 (46%)      | 9 (39%)         | 31 (36%)    | 40 (43%)        |       |
| Anoxia                                | 8 (5)         | 2 (9%)          | 11 (13%)    | 5 (5%)          |       |
| Other                                 | 10 (6%)       | 2 (9%)          | 1 (1%)      | 7 (7%)          |       |
| <b>Operative Characteristics</b>      |               |                 |             |                 |       |
| <b>Cardiopulmonary Bypass (n=194)</b> | 93 (59%)      | 10 (43%)        | 33 (38%)    | 55 (60%)        | 0.020 |
| <b>Bilateral Transplant</b>           | 103 (66%)     | 14 (61%)        | 53 (62%)    | 69 (75%)        | 0.27  |
| <b>Intra-Op Nitric Oxide</b>          | 95 (61%)      | 15 (65%)        | 55 (63%)    | 61 (65%)        | 0.90  |
| <b>Intra-Op Crystalloids (mL)</b>     | 2351 ± 1583   | 3422.7 ± 1930   | 2850 ± 1807 | 3132.5 ± 2013.1 | 0.39  |
| <b>Tidal Volume (cc)</b>              | 597.5 ± 119   | 567.6 ± 106     | 614.6 ± 118 | 575.8 ± 125     | 0.62  |
| <b>Reperfusion FiO2</b>               | 73.8 ± 30.2   | 69.3 ± 29.2     | 69 ± 31.2   | 71.3 ± 28.0     | 0.90  |
| <b>PRBC (mL)</b>                      | 1389.8 ± 1579 | 1203.5 ± 1063.6 | 1526 ± 1372 | 1126 ± 1443.9   | 0.26  |
| <b>mean PAP (mmHg)</b>                | 34.3 ± 17.7   | 29.7 ± 13       | 28.6 ± 12.9 | 30.3 ± 11.7     | <0.01 |

Online supplements are not copyedited prior to posting.
